# Supplementary material
Source: publisher figshare collection journal article supplement (https://gsapubs.figshare.com/ndownloader/files/26669594)
Supplement: Supplementary file 1 [file 26669594]

## Sheet: Sheet1
Supplementary Data 9. Correlation test between the thickness of the melanin extracts and the concentrations of elements of interests.
	Cu	Zn	Ti	Mn	Fe	Ca	P	Ni
Correlation test	0.591092	0.162126	0.141444	0.874301	0.88512	0.0765744	0.207924	0.248356

## Sheet: G48696
Rossi, V., Webb, S.M., and McNamara, M., 2021, Maturation experiments reveal bias in the chemistry of fossil melanosomes: Geology, v. 49, https://doi.org/10.1130/G48696.1
